# Supplementary material for: Comorbidity patterns in institutionalized older adults affected by dementia
Source: PubMed Central journal article supplement — Alzheimers Dement (Amst). 2022 Jun 14;14(1):e12320. doi: 10.1002/dad2.12320 (PMC9197250; doi:10.1002/dad2.12320), 2022-06-14

**Supplementary Table 1. Chronic diseases investigated through the interRAI-LTCF data collection tool with the final 15 considered in the study shown in bold.**

| Initial 55 chronic diseases considered using the interRAI-LTCF instrument |                                         |
|---------------------------------------------------------------------------|-----------------------------------------|
| Allergy                                                                   | <b>Hip fracture</b>                     |
| Anaemia                                                                   | Hypertension                            |
| <b>Arrhythmia</b>                                                         | Inflammatory arthropathies              |
| Asthma                                                                    | <b>Ischemic heart disease</b>           |
| <b>Atrial fibrillation</b>                                                | Migraine and facial pain                |
| Autoimmune diseases                                                       | Multiple sclerosis                      |
| Backbone pathology                                                        | <b>Neurotic stress-related diseases</b> |
| Blood and blood-forming organs diseases                                   | Obesity                                 |
| Bowel disease                                                             | <b>Osteoarthritis</b>                   |
| Cancer                                                                    | Osteoporosis                            |
| Cataract                                                                  | Other cardiovascular diseases           |
| <b>Cerebrovascular disease</b>                                            | Other eye diseases                      |
| Chron infections                                                          | Other gastrointestinal system diseases  |
| Chronic kidney disease                                                    | Other genitourinary system diseases     |
| Chronic liver disease                                                     | Other metabolic system diseases         |
| <b>COPD</b>                                                               | <b>Other MSK</b>                        |
| Colitis related disease                                                   | Other pancreas diseases                 |
| <b>Depression</b>                                                         | Other psychiatric diseases              |
| Diabetes                                                                  | Other respiratory system diseases       |
| Dyslipidemia                                                              | Other skin diseases                     |
| Ear-nose-throat (ENT) problems                                            | Parkinson                               |
| Epilepsy                                                                  | Prostate disease                        |
| Esophagus, stomach and Duodenum problems                                  | <b>Schizophrenia</b>                    |
| Glaucoma                                                                  | Skin ulcer                              |
| <b>Heart failure</b>                                                      | <b>Thyroid disease</b>                  |
| Heart valve                                                               | Venous lymphatic disease                |
| <b>Hearing impairment – deafness</b>                                      | <b>Visual impairment – blindness</b>    |
| Hematological neoplasia                                                   |                                         |

Notes: COPD = Chronic obstructive pulmonary disease; MSK = musculoskeletal; Neurotic stress-related diseases comprehended items 300-316 of ICD-9 codes (Neurotic disorders; Personality disorders; Sexual deviations and disorders; Alcohol dependence syndrome; Drug dependence; Nondependent abuse of drugs; Physiological malfunction arising from mental factors; Special symptoms or syndromes, not elsewhere classified; Acute reaction to stress; Adjustment reaction; Specific nonpsychotic mental disorders following organic brain damage; Depressive disorder, not elsewhere classified; Disturbance of conduct, not elsewhere classified; Disturbance of emotions specific to childhood and adolescence; Hyperkinetic syndrome of childhood; Specific delays in development; Psychic factors associated with diseases classified elsewhere).

**Supplementary Figure 1 - Screeplot from Principal Component Analysis**

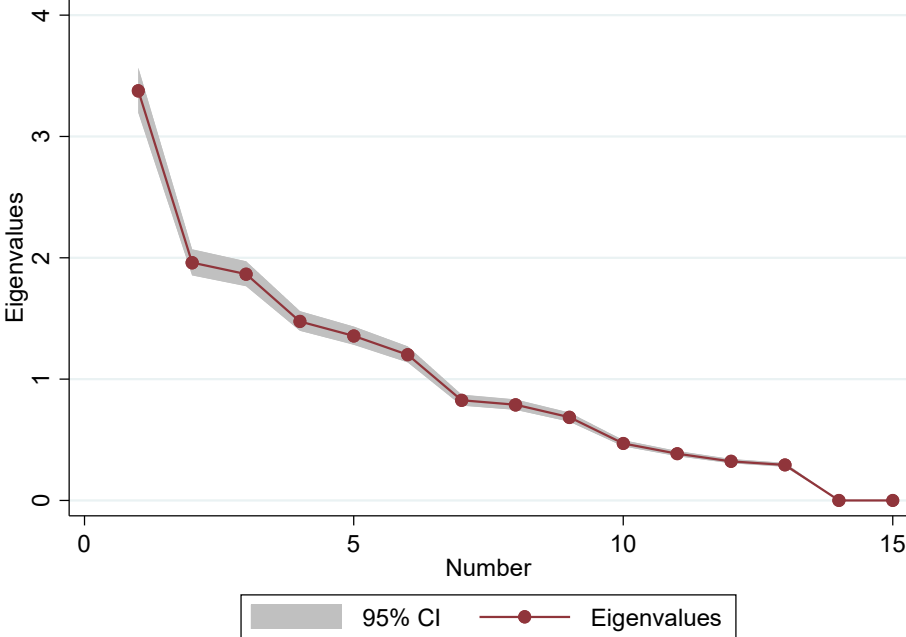

Supplement: DAD2-14-e12320-s001.pdf [file DAD2-14-e12320-s001.pdf]
